# Supplementary material
Source: publisher figshare collection journal article supplement (https://aacr.figshare.com/ndownloader/files/39996161)
Supplement: Supplementary file 1 [file 39996161]

## Sheet: GSEA_C643
Positively enriched gene expression signatures by GSEA using MsigDB-HALLMARKS and CANONICAL PATHWAYS genesets in C643 vs. C643-spl-rev cells.
I. MsigDB-HALLMARKS
NAME	GS<br> follow link to MSigDB	SIZE	ES	NES	NOM p-val	FDR q-val
HALLMARK_G2M_CHECKPOINT	HALLMARK_G2M_CHECKPOINT	181	0.527888	1.91318	0	0.00147321
HALLMARK_E2F_TARGETS	HALLMARK_E2F_TARGETS	190	0.491758	1.80701	0	0.00500935
HALLMARK_OXIDATIVE_PHOSPHORYLATION	HALLMARK_OXIDATIVE_PHOSPHORYLATION	187	0.454714	1.67032	0	0.0218248
HALLMARK_MYC_TARGETS_V1	HALLMARK_MYC_TARGETS_V1	196	0.440265	1.63635	0.00136986	0.0186178
HALLMARK_FATTY_ACID_METABOLISM	HALLMARK_FATTY_ACID_METABOLISM	108	0.46489	1.60529	0.00150376	0.0192413
HALLMARK_ANDROGEN_RESPONSE	HALLMARK_ANDROGEN_RESPONSE	74	0.502406	1.6064	0.00619195	0.0223403
HALLMARK_CHOLESTEROL_HOMEOSTASIS	HALLMARK_CHOLESTEROL_HOMEOSTASIS	55	0.539145	1.66809	0.00745157	0.0165404
HALLMARK_MTORC1_SIGNALING	HALLMARK_MTORC1_SIGNALING	180	0.390799	1.41196	0.0140845	0.0891126
HALLMARK_SPERMATOGENESIS	HALLMARK_SPERMATOGENESIS	51	0.465221	1.41668	0.046729	0.0966172
II. MsigDB-CANONICAL PATHWAYS
NAME	GS<br> follow link to MSigDB	SIZE	ES	NES	NOM p-val	FDR q-val
REACTOME_CHOLESTEROL_BIOSYNTHESIS	REACTOME_CHOLESTEROL_BIOSYNTHESIS	18	0.788537	1.9492	0	0.0322663
REACTOME_DEPOSITION_OF_NEW_CENPA_CONTAINING_NUCLEOSOMES_AT_THE_CENTROMERE	REACTOME_DEPOSITION_OF_NEW_CENPA_CONTAINING_NUCLEOSOMES_AT_THE_CENTROMERE	30	0.683013	1.88257	0	0.0689617
REACTOME_MITOTIC_PROMETAPHASE	REACTOME_MITOTIC_PROMETAPHASE	77	0.570229	1.85233	0	0.0874047
REACTOME_3_UTR_MEDIATED_TRANSLATIONAL_REGULATION	REACTOME_3_UTR_MEDIATED_TRANSLATIONAL_REGULATION	99	0.51714	1.74981	0	0.181709
REACTOME_CELL_CYCLE	REACTOME_CELL_CYCLE	325	0.440695	1.71513	0	0.18857
REACTOME_TRANSLATION	REACTOME_TRANSLATION	137	0.47289	1.67435	0	0.250039
REACTOME_CELL_CYCLE_MITOTIC	REACTOME_CELL_CYCLE_MITOTIC	275	0.432652	1.66666	0	0.253698
KEGG_SPLICEOSOME	KEGG_SPLICEOSOME	116	0.467284	1.6204	0	0.27268
REACTOME_METABOLISM_OF_RNA	REACTOME_METABOLISM_OF_RNA	232	0.42194	1.56819	0	0.336015
REACTOME_DNA_REPLICATION	REACTOME_DNA_REPLICATION	172	0.446415	1.61725	0.00133333	0.269478
REACTOME_MITOTIC_M_M_G1_PHASES	REACTOME_MITOTIC_M_M_G1_PHASES	153	0.450522	1.61095	0.00141443	0.273438
REACTOME_ACTIVATION_OF_THE_MRNA_UPON_BINDING_OF_THE_CAP_BINDING_COMPLEX_AND_EIFS_AND_SUBSEQUENT_BINDING_TO_43S	REACTOME_ACTIVATION_OF_THE_MRNA_UPON_BINDING_OF_THE_CAP_BINDING_COMPLEX_AND_EIFS_AND_SUBSEQUENT_BINDING_TO_43S	53	0.566572	1.74086	0.00154321	0.163294
PID_PLK1_PATHWAY	PID_PLK1_PATHWAY	40	0.740518	2.1409	0.0015748	0.00191663
REACTOME_METABOLISM_OF_PROTEINS	REACTOME_METABOLISM_OF_PROTEINS	335	0.37546	1.45778	0.00252525	0.45908
KEGG_PARKINSONS_DISEASE	KEGG_PARKINSONS_DISEASE	88	0.497096	1.66295	0.00302115	0.24888
REACTOME_RESPIRATORY_ELECTRON_TRANSPORT_ATP_SYNTHESIS_BY_CHEMIOSMOTIC_COUPLING_AND_HEAT_PRODUCTION_BY_UNCOUPLING_PROTEINS_	REACTOME_RESPIRATORY_ELECTRON_TRANSPORT_ATP_SYNTHESIS_BY_CHEMIOSMOTIC_COUPLING_AND_HEAT_PRODUCTION_BY_UNCOUPLING_PROTEINS_	73	0.510173	1.64159	0.00312989	0.288813
REACTOME_RESPIRATORY_ELECTRON_TRANSPORT	REACTOME_RESPIRATORY_ELECTRON_TRANSPORT	60	0.564144	1.75665	0.00315956	0.189334
KEGG_PYRUVATE_METABOLISM	KEGG_PYRUVATE_METABOLISM	27	0.659146	1.79574	0.00334448	0.15977
REACTOME_METABOLISM_OF_MRNA	REACTOME_METABOLISM_OF_MRNA	192	0.393883	1.46566	0.00408163	0.452877
REACTOME_TCA_CYCLE_AND_RESPIRATORY_ELECTRON_TRANSPORT	REACTOME_TCA_CYCLE_AND_RESPIRATORY_ELECTRON_TRANSPORT	107	0.463949	1.58517	0.00453858	0.322434
REACTOME_FORMATION_OF_THE_TERNARY_COMPLEX_AND_SUBSEQUENTLY_THE_43S_COMPLEX	REACTOME_FORMATION_OF_THE_TERNARY_COMPLEX_AND_SUBSEQUENTLY_THE_43S_COMPLEX	45	0.589162	1.74106	0.00477707	0.181216
KEGG_SYSTEMIC_LUPUS_ERYTHEMATOSUS	KEGG_SYSTEMIC_LUPUS_ERYTHEMATOSUS	26	0.643723	1.71596	0.00492611	0.203739
PID_AURORA_B_PATHWAY	PID_AURORA_B_PATHWAY	32	0.623431	1.77421	0.00501672	0.178065
REACTOME_PEPTIDE_CHAIN_ELONGATION	REACTOME_PEPTIDE_CHAIN_ELONGATION	80	0.478748	1.57939	0.00606061	0.328245
KEGG_CELL_CYCLE	KEGG_CELL_CYCLE	104	0.442627	1.52986	0.00614439	0.406353
REACTOME_INFLUENZA_LIFE_CYCLE	REACTOME_INFLUENZA_LIFE_CYCLE	128	0.427659	1.50764	0.00708215	0.408698
KEGG_HUNTINGTONS_DISEASE	KEGG_HUNTINGTONS_DISEASE	134	0.433451	1.5275	0.00728863	0.390389
REACTOME_CHROMOSOME_MAINTENANCE	REACTOME_CHROMOSOME_MAINTENANCE	75	0.481382	1.57239	0.00747384	0.335292
REACTOME_METABOLISM_OF_NON_CODING_RNA	REACTOME_METABOLISM_OF_NON_CODING_RNA	43	0.559876	1.63961	0.00778816	0.278643
KEGG_RIBOSOME	KEGG_RIBOSOME	82	0.467387	1.54644	0.00903614	0.379238
KEGG_CITRATE_CYCLE_TCA_CYCLE	KEGG_CITRATE_CYCLE_TCA_CYCLE	27	0.618936	1.67593	0.0100334	0.265699
REACTOME_NONSENSE_MEDIATED_DECAY_ENHANCED_BY_THE_EXON_JUNCTION_COMPLEX	REACTOME_NONSENSE_MEDIATED_DECAY_ENHANCED_BY_THE_EXON_JUNCTION_COMPLEX	99	0.464274	1.56086	0.0105581	0.346705
KEGG_AMINOACYL_TRNA_BIOSYNTHESIS	KEGG_AMINOACYL_TRNA_BIOSYNTHESIS	38	0.562698	1.62862	0.0109204	0.293118
PID_ATR_PATHWAY	PID_ATR_PATHWAY	37	0.553224	1.59154	0.0114943	0.317015
PID_FOXM1_PATHWAY	PID_FOXM1_PATHWAY	31	0.580313	1.6281	0.0136519	0.280121
REACTOME_REGULATION_OF_MITOTIC_CELL_CYCLE	REACTOME_REGULATION_OF_MITOTIC_CELL_CYCLE	69	0.469984	1.48325	0.0152905	0.436899
REACTOME_INFLUENZA_VIRAL_RNA_TRANSCRIPTION_AND_REPLICATION	REACTOME_INFLUENZA_VIRAL_RNA_TRANSCRIPTION_AND_REPLICATION	96	0.448309	1.48218	0.017673	0.430311
REACTOME_SRP_DEPENDENT_COTRANSLATIONAL_PROTEIN_TARGETING_TO_MEMBRANE	REACTOME_SRP_DEPENDENT_COTRANSLATIONAL_PROTEIN_TARGETING_TO_MEMBRANE	101	0.420112	1.45382	0.0176991	0.445245
REACTOME_MRNA_PROCESSING	REACTOME_MRNA_PROCESSING	143	0.38901	1.38921	0.0184136	0.513159
REACTOME_RNA_POL_I_PROMOTER_OPENING	REACTOME_RNA_POL_I_PROMOTER_OPENING	15	0.675646	1.62397	0.0185497	0.277709
REACTOME_ADAPTIVE_IMMUNE_SYSTEM	REACTOME_ADAPTIVE_IMMUNE_SYSTEM	329	0.332568	1.28331	0.0213568	0.61878
REACTOME_RNA_POL_I_RNA_POL_III_AND_MITOCHONDRIAL_TRANSCRIPTION	REACTOME_RNA_POL_I_RNA_POL_III_AND_MITOCHONDRIAL_TRANSCRIPTION	66	0.465737	1.45983	0.0218069	0.462047
REACTOME_TRANSCRIPTION	REACTOME_TRANSCRIPTION	138	0.397211	1.40952	0.0233918	0.510285
KEGG_OXIDATIVE_PHOSPHORYLATION	KEGG_OXIDATIVE_PHOSPHORYLATION	94	0.421284	1.40692	0.0273556	0.494725
KEGG_OOCYTE_MEIOSIS	KEGG_OOCYTE_MEIOSIS	78	0.443422	1.44644	0.027735	0.45039
KEGG_PPAR_SIGNALING_PATHWAY	KEGG_PPAR_SIGNALING_PATHWAY	28	0.554245	1.54421	0.0343699	0.374482
BIOCARTA_MPR_PATHWAY	BIOCARTA_MPR_PATHWAY	26	0.568419	1.52241	0.0358891	0.373806
BIOCARTA_GPCR_PATHWAY	BIOCARTA_GPCR_PATHWAY	26	0.55519	1.47851	0.0372168	0.421987
REACTOME_RECYCLING_PATHWAY_OF_L1	REACTOME_RECYCLING_PATHWAY_OF_L1	21	0.603055	1.52361	0.0380165	0.390751
REACTOME_PROCESSING_OF_CAPPED_INTRON_CONTAINING_PRE_MRNA	REACTOME_PROCESSING_OF_CAPPED_INTRON_CONTAINING_PRE_MRNA	129	0.397262	1.38628	0.039823	0.508688
REACTOME_SIGNALING_BY_THE_B_CELL_RECEPTOR_BCR	REACTOME_SIGNALING_BY_THE_B_CELL_RECEPTOR_BCR	93	0.400177	1.36724	0.041411	0.526935
REACTOME_APC_C_CDH1_MEDIATED_DEGRADATION_OF_CDC20_AND_OTHER_APC_C_CDH1_TARGETED_PROTEINS_IN_LATE_MITOSIS_EARLY_G1	REACTOME_APC_C_CDH1_MEDIATED_DEGRADATION_OF_CDC20_AND_OTHER_APC_C_CDH1_TARGETED_PROTEINS_IN_LATE_MITOSIS_EARLY_G1	58	0.464166	1.45104	0.042654	0.444858
BIOCARTA_ATRBRCA_PATHWAY	BIOCARTA_ATRBRCA_PATHWAY	18	0.612793	1.52752	0.0439189	0.401815
REACTOME_SYNTHESIS_AND_INTERCONVERSION_OF_NUCLEOTIDE_DI_AND_TRIPHOSPHATES	REACTOME_SYNTHESIS_AND_INTERCONVERSION_OF_NUCLEOTIDE_DI_AND_TRIPHOSPHATES	17	0.616245	1.48358	0.045	0.445918
REACTOME_TELOMERE_MAINTENANCE	REACTOME_TELOMERE_MAINTENANCE	43	0.482663	1.42703	0.0489731	0.494707
